# Supplementary material for: Space-time analysis of work-related musculoskeletal disorders in Brazil: an ecological study
Source: PubMed Central journal article supplement (PMC11286264; doi:10.1590/0102-311xen141823), 2024-07-22
Supplement: 1678-4464-csp-40-07-EN141823-s.pdf [file 1678-4464-csp-40-07-EN141823-s.pdf]

**SUPPLEMENTARY MATERIAL**

**Table S1** Description of study variables.

| Classification          |                                                                                                                                                                                 | Parameter                                           | Description                                        | Analysis                                                      |                                              |
|-------------------------|---------------------------------------------------------------------------------------------------------------------------------------------------------------------------------|-----------------------------------------------------|----------------------------------------------------|---------------------------------------------------------------|----------------------------------------------|
| Dependent               |                                                                                                                                                                                 | Incidence rate (per 100,000 working age population) | Calculated at the municipality and regional levels | Time trends<br>Spatial cluster<br>Spatiotemporal cluster      |                                              |
| Independent             | Explanatory                                                                                                                                                                     | Demographic                                         | Year of occurrence                                 | 2007 to 2019                                                  | Time trends                                  |
|                         |                                                                                                                                                                                 |                                                     | Region of residence                                | North, Northeast, South, Southeast, and Central-West          | Descriptive epidemiological characterization |
|                         |                                                                                                                                                                                 |                                                     | Sex                                                | Male and female                                               |                                              |
|                         |                                                                                                                                                                                 |                                                     | Age group (years)                                  | ≤ 15, 15-24, 25-44, 45-59, and ≥ 60                           |                                              |
|                         |                                                                                                                                                                                 |                                                     | Ethnicity/Skin color                               | White and non-white                                           |                                              |
|                         |                                                                                                                                                                                 |                                                     | Residence zone                                     | Rural, urban, and periurban                                   |                                              |
|                         |                                                                                                                                                                                 |                                                     | Level of education                                 | Basic education (< 12 years)<br>Higher education (> 12 years) |                                              |
|                         |                                                                                                                                                                                 |                                                     | Case type                                          | New case, relapse, and transference                           |                                              |
|                         |                                                                                                                                                                                 | Clinical outcome                                    | Cure, abandonment, death, and transference         |                                                               |                                              |
|                         |                                                                                                                                                                                 | Clinical                                            | Comorbidities                                      | Hypertension<br>Diabetes<br>Mental disorders                  |                                              |
| Clinical manifestations | Sensitivity alterations<br>Limited range of motion<br>Muscular weakness<br>Decreased movement<br>Phlogistic signs<br>Pain<br>Limitation for activities<br>Absence for treatment |                                                     |                                                    |                                                               |                                              |
